# Supplementary material
Source: MDPI journal article supplement (https://www.mdpi.com/1996-1073/16/13/4984)
Supplement: s1 [file s1 › energies-2439462-supplementary.pdf]

# Approaching the Theoretical Maximum Performance of Highly Transparent Thermochromic Windows

*Daniel Mann,<sup>a,b\*</sup> Lavinia Calvi,<sup>c,d,e</sup> Cindy P. K. Yeung,<sup>a,b</sup> Roberto Habets,<sup>a,b</sup> Ken Elen,<sup>c,d,e</sup> An Hardy,<sup>c,d,e</sup> Marlies K. Van Bael<sup>c,d,e</sup> and Pascal Buskens<sup>a,b,c\*</sup>*

<sup>a</sup> The Netherlands Organisation for Applied Scientific Research (TNO), High Tech Campus 25, 5656AE Eindhoven, The Netherlands.

<sup>b</sup> Brightlands Materials Center, Urmonderbaan 22, 6167RD Geleen, The Netherlands.

<sup>c</sup> Design and Synthesis of Inorganic Materials (DESINe), Institute for Materials Research, Hasselt University, Agoralaan Building D, 3590 Diepenbeek, Belgium.

<sup>d</sup> IMEC vzw, IMOMEC Associated Laboratory, Wetenschapspark 1, 3590 Diepenbeek, Belgium.

<sup>e</sup> EnergyVille, Thor Park 8320, 3600 Genk, Belgium.

\*Correspondence: Daniel.Mann@TNO.nl; Pascal.Buskens@TNO.nl

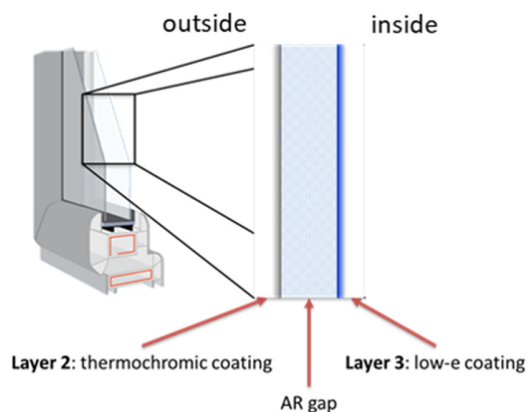

**Figure S1.** Theoretical built up of insulated glazing unit (IGU) with 4 mm outer glass pane and thermochromic coating on layer 2, 12 mm argon gas space and 4 mm inner glass pane with low-e coating on layer 3.

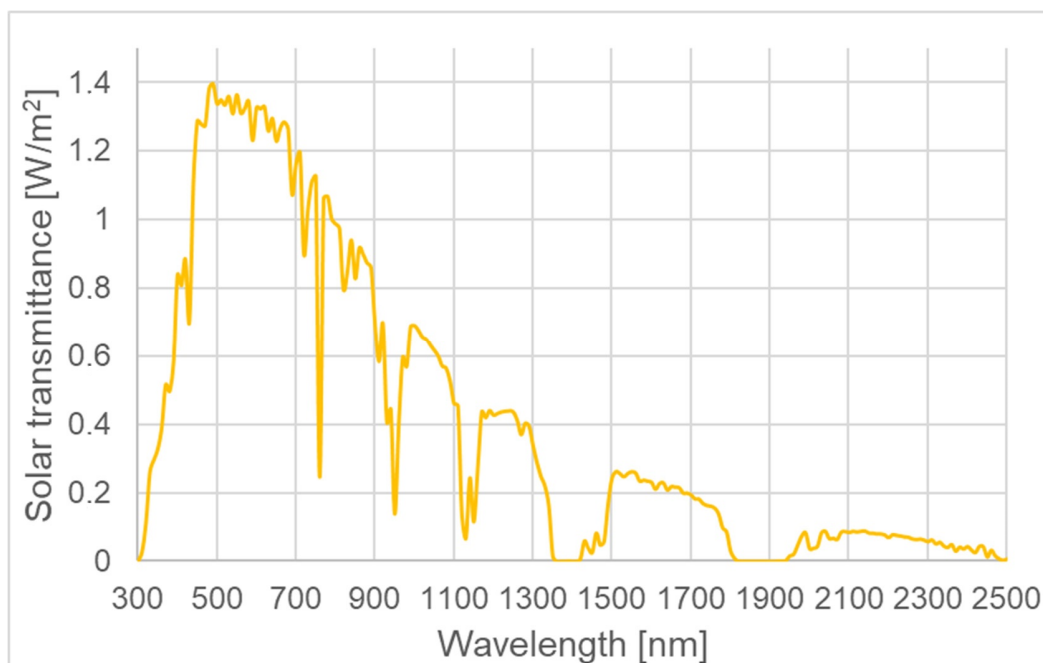

**Figure S2.** AM1.5 solar spectrum with characteristic atmospheric absorption. UV, visible and IR light are defined as wavelength regions <380 nm, between 380 – 780 nm and >780 nm, respectively.
